# Supplementary material for: 28S rRNA-Derived Fragments Represent an Independent Molecular Predictor of Short-Term Relapse in Prostate Cancer
Source: MDPI journal article supplement (doi:10.3390/ijms25010239), 2023-12-23
Supplement: s1 [file s1]

**Table S2.** Logistic regression analysis for the discrimination of PCa from BPH patients.

| Covariant            | <u>Univariate Analysis</u> |                     |                              | <u>Multivariate Analysis<sup>a</sup></u> |                     |                              |
|----------------------|----------------------------|---------------------|------------------------------|------------------------------------------|---------------------|------------------------------|
|                      | OR <sup>b</sup>            | 95% CI <sup>c</sup> | <i>p</i> -value <sup>d</sup> | OR <sup>b</sup>                          | 95% CI <sup>c</sup> | <i>p</i> -value <sup>d</sup> |
| <b>log (28S rRF)</b> | 0.524                      | 0.349-0.785         | 0.002                        | 0.462                                    | 0.277-0.773         | 0.003                        |
| <b>PSA</b>           | 1.167                      | 1.048-1.300         | 0.005                        | 1.141                                    | 1.018-1.279         | 0.024                        |
| <b>Gender</b>        | 0.895                      | 0.841-0.951         | <0.001                       | 0.917                                    | 0.856-0.982         | 0.014                        |

<sup>a</sup> Multivariate logistic regression models adjusted for log<sub>10</sub> 28S rRF, serum PSA and age.

<sup>b</sup> Odds ratio.

<sup>c</sup> Confidence interval of the estimated OR.

<sup>d</sup> Test for trend.
