# Supplementary material for: 28S rRNA-Derived Fragments Represent an Independent Molecular Predictor of Short-Term Relapse in Prostate Cancer
Source: MDPI journal article supplement (doi:10.3390/ijms25010239), 2023-12-23
Supplement: s1 [file s1]

**Table S1.** Descriptive statistics of 28S rRF levels in PCa and BPH patients.

| Variables  | Mean ± SE   | Range        | Percentiles |       |       |       |       |
|------------|-------------|--------------|-------------|-------|-------|-------|-------|
|            |             |              | 10          | 25    | 50    | 75    | 90    |
|            |             |              | (median)    |       |       |       |       |
| PCa (n=89) |             |              |             |       |       |       |       |
| 28S rRF    | 0.70 ± 0.44 | <0.001-38.87 | 0.004       | 0.009 | 0.025 | 0.198 | 1.084 |
| BPH (n=53) |             |              |             |       |       |       |       |
| 28S rRF    | 0.38 ± 0.07 | <0.001-2.71  | 0.011       | 0.044 | 0.168 | 0.515 | 1.086 |

SE: Standard error.
